# Supplementary material for: Rapid and sensitive colorimetric sensing of the insecticide pymetrozine using melamine-modified gold nanoparticles
Source: Royal Society of Chemistry journal article supplement (doi:10.1039/c7ay02658g), 2017-12-11
Supplement: c7ay02658g1.pdf [file c7ay02658g1.pdf]

## Support Information

### Rapid and Sensitive Colorimetric Sensing of the Insecticide Pymetrozine Using Melamine-Modified Gold Nanoparticles

Jing-yan Kang,<sup>ab</sup> Yu-jie Zhang,<sup>b</sup> Xing Li,<sup>\*ab</sup> Chen Dong,<sup>b</sup> Hong-yu Liu,<sup>b</sup> Li-jing Miao,<sup>b</sup> Paul J. Low,<sup>c</sup> Zhi-xian Gao,<sup>d</sup> Narayan S. Hosmane<sup>a</sup> and Ai-guo Wu<sup>\*a</sup>

<sup>a</sup> *Key Laboratory of Magnetic Materials and Devices, and Division of Functional Materials and Nanodevices, Ningbo Institute of Materials Technology and Engineering, Ningbo 315201, China*

<sup>b</sup> *School of Science, Faculty of Materials Science and Chemical Engineering, Ningbo University, Ningbo 315211, China*

<sup>c</sup> *School of Chemistry and Biochemistry, University of Western Australia, 35 Stirling Highway, Crawley 6009, Australia*

<sup>d</sup> *Tianjin Key Laboratory of Risk Assessment and Control Technology for Environment and Food Safety, Institute of Health and Environmental Medicine, Tianjin 300050, China*

**\*Corresponding Author**

*\*E-mail: aiguo@nimte.ac.cn. Phone: +86 574 86685039.*

*Fax: +86 574 86685163*

*\*E-mail: lixing@nbu.edu.cn. Phone: +86 574-87600869*

*Fax: +86 574 87609987.*

### Table of content

#### Characterization of materials

FigureS1. (a) The structure of pymetrozine; (b) The structure of melamine.....S-2

Figure S2. The EDS of Au NPs and M-Au NPs.....S-2

#### Optimized of experiment conditions

Figure S3 Effect of different concentration of melamine for the detection of 0.1 μM PYM with M-Au NPs.....S-3

Figure S4. Effect of pH on the detection of 0.2 μM PYM with M-Au NPs.....S-3

Figure S5. Effect of reaction time on the detection of 0.2 μM PYM with M-Au NPs.....S-4

Figure S6. UV-Vis absorption spectra of (a) M-Au NPs and (b) M-Au NPs with 0.08 μM PYM.S-4

Table S1. Comparison of various typical techniques for PYM analysis in solution.....S-5

## Characterization of materials

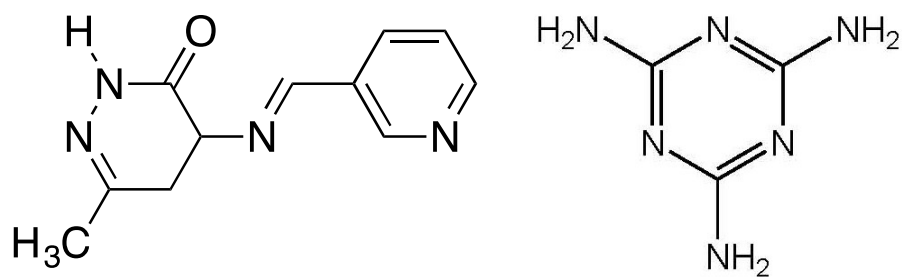

**Figure S1.** (a) The structure of pymetrozine; (b) the structure of melamine

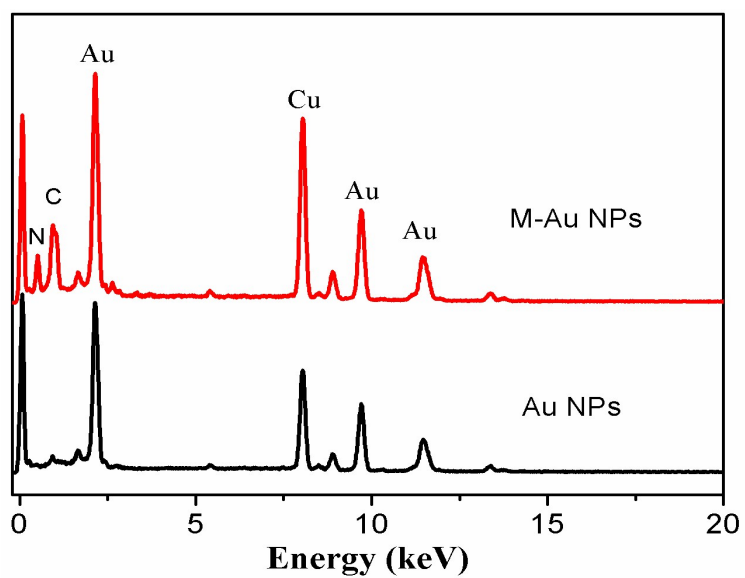

**Figure S2.** The EDS of Au NPs and M-Au NPs

## Optimized of experiment conditions

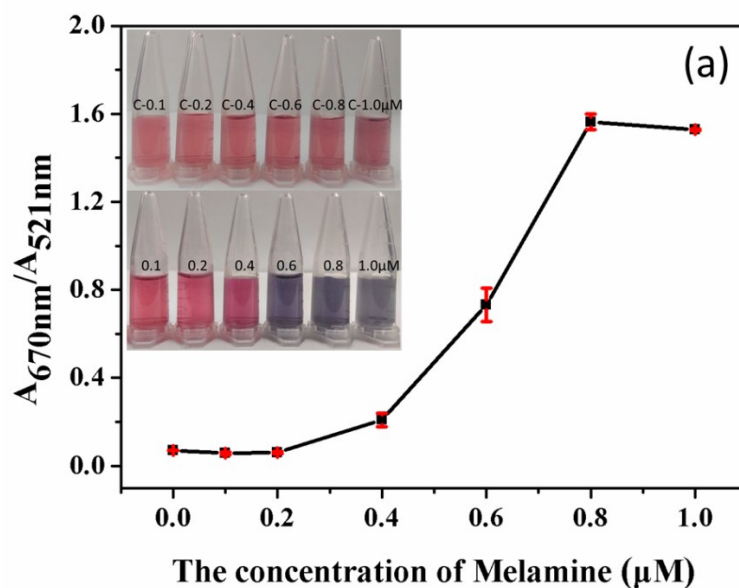

**Figure S3.** Effect of different concentration of melamine for the detection of 0.1  $\mu\text{M}$  PYM with M-Au NPs ( $A_{670\text{nm}}$ : the absorbance of the new appeared peak of M-Au NPs dispersion with PYM and  $A_{521\text{nm}}$ : the absorbance of primary peak of M-Au NPs)

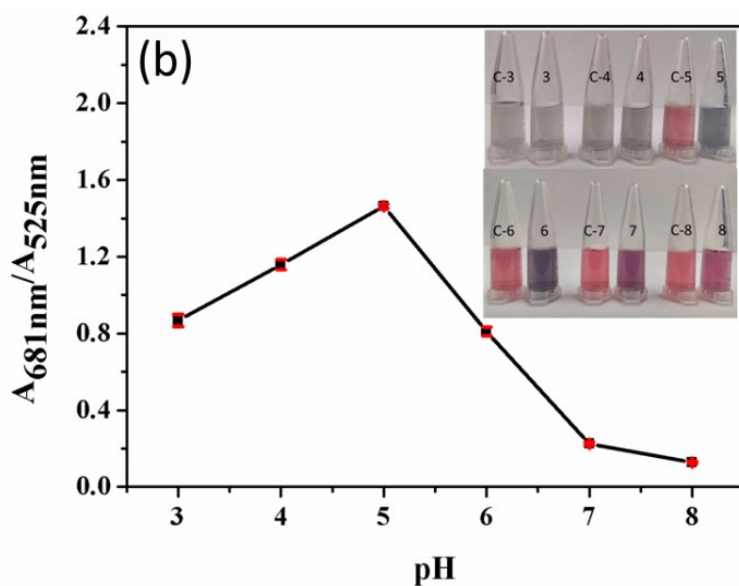

**Figure S4.** Effect of pH on the detection of 0.2  $\mu\text{M}$  PYM with M-Au NPs ( $A_{681\text{nm}}$  is the absorbance of the new appeared peak of M- Au NPs dispersion with PYM and  $A_{525\text{nm}}$  is the absorbance of primary peak of M-Au NPs)

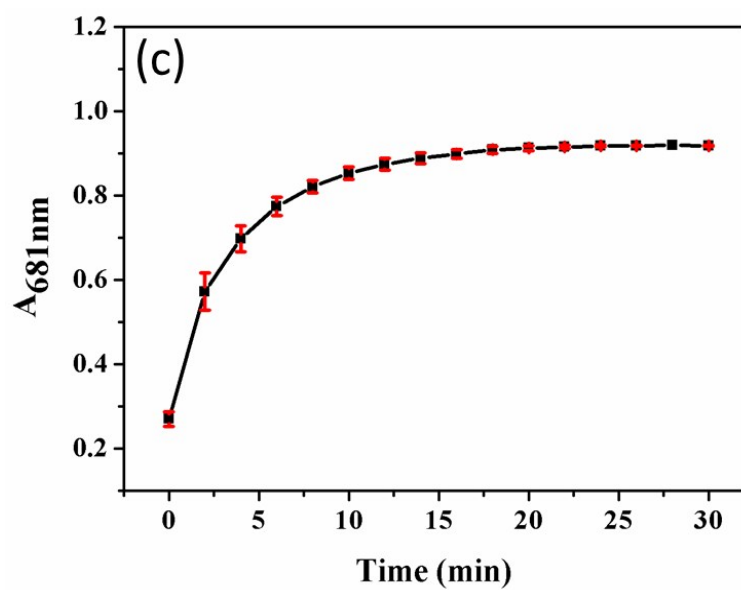

**Figure S5.** Effect of reaction time on the detection of 0.2  $\mu\text{M}$  PYM with M-Au NPs at pH=5 ( $A_{681\text{nm}}$  absorbance: the new peak of M-Au NPs dispersion with PYM)

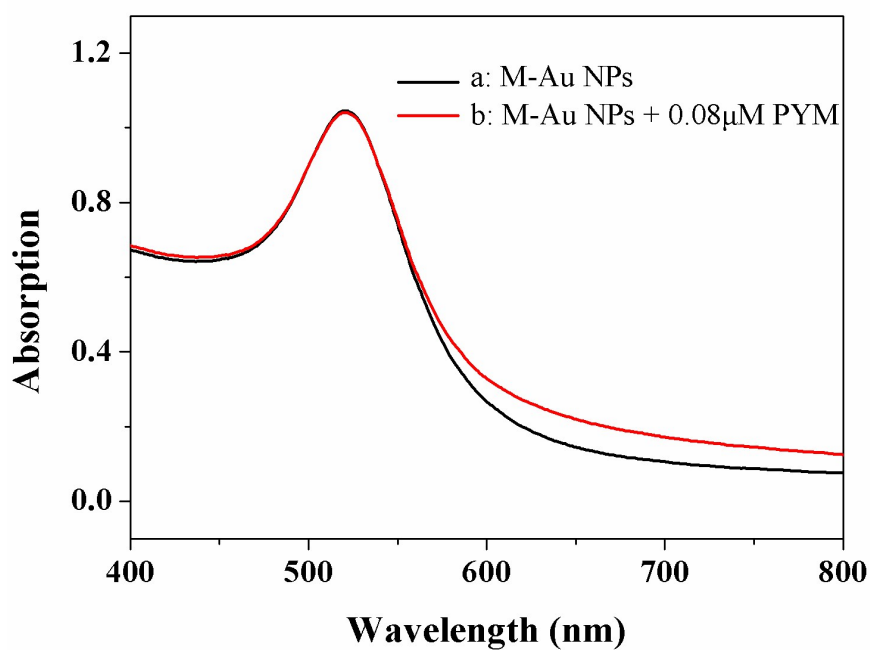

**Figure S6.** UV-Vis absorption spectra of (a) M-Au NPs and (b) M-Au NPs with 0.08  $\mu\text{M}$  PYM

**Table S1. Comparison of various typical techniques for PYM analysis in solution**

| Method          | LOD (Naked eyes / UV-Vis) | Selectivity | Linear range (nM) | Ref.      |
|-----------------|---------------------------|-------------|-------------------|-----------|
| GC              | --/ 55nM                  | --          | 13.8-4600         | 7         |
| Electrochemical | --/80nM                   | --          | 100-5000          | 11        |
| DPP             | --/148nM                  | Good        | 497-7350          | 13        |
| HPLC            | --/92nM                   | --          | --                | 29        |
| Colorimetry     | --/46nM                   | Good        | 92-460            | 25        |
| Colorimetry     | 1 $\mu$ M/--              | Good        | 4.6-368           | 26        |
| Colorimetry     | 80nM/10nM                 | Good        | 10-1000           | This work |
